# Supplementary material for: Chromosome 1q21 abnormalities refine outcome prediction in patients with multiple myeloma - a meta-analysis of 2,596 trial patients
Source: PubMed Central journal article supplement — Haematologica. 2021 Jun 3;106(10):2754–8. doi: 10.3324/haematol.2021.278888 (PMC8485656; doi:10.3324/haematol.2021.278888), 2021-06-03
Supplement: 2021_278888_WEINHOLD_SUPPL.pdf [file 2021_278888_WEINHOLD_SUPPL.pdf]

**Chromosome 1q21 abnormalities refine outcome prediction in patients with multiple myeloma – a meta-analysis of 2,596 trial patients**

Niels Weinhold,<sup>1</sup> Hans J. Salwender,<sup>2</sup> David A. Cairns,<sup>3</sup> Marc S. Raab,<sup>1</sup> George Waldron,<sup>4</sup> Igor W. Blau,<sup>5</sup> Uta Bertsch,<sup>1</sup> Thomas Hielscher,<sup>6</sup> Gareth J. Morgan,<sup>7</sup> Anna Jauch,<sup>8</sup> Faith E. Davies,<sup>7</sup> Mathias Hänel,<sup>9</sup> Gordon Cook,<sup>10</sup> Christoph Scheid,<sup>11</sup> Richard Houlston,<sup>2</sup> Hartmut Goldschmidt,<sup>1,12</sup> Graham Jackson<sup>13</sup> and Martin F. Kaiser<sup>4,14</sup>

<sup>1</sup>Department of Internal Medicine V, University Clinic Heidelberg, Heidelberg, Germany; <sup>2</sup>Asklepios Tumorzentrum Hamburg, AK Altona and AK St. Georg, Hamburg, Germany; <sup>3</sup>Clinical Trials Research Unit, Leeds Institute of Clinical Trials Research, Leeds, UK; <sup>4</sup>Division of Genetics and Epidemiology, The Institute of Cancer Research, London, UK; <sup>5</sup>Medical Clinic, Charité University Medicine Berlin, Berlin, Germany; <sup>6</sup>Division of Biostatistics, German Cancer Research Center (DKFZ) Heidelberg, Heidelberg, Germany; <sup>7</sup>Perlmutter Cancer Center, NYU Langone Health, NY, USA; <sup>8</sup>Institute of Human Genetics, University of Heidelberg, Heidelberg, Germany; <sup>9</sup>Department of Internal Medicine III, Klinikum Chemnitz, Chemnitz, Germany; <sup>10</sup>Leeds Institute of Cancer and Pathology, University of Leeds, Leeds, UK; <sup>11</sup>Department I of Internal Medicine and Center of Integrated Oncology Cologne Bonn, University of Cologne, Cologne, Germany; <sup>12</sup>National Center for Tumor Diseases (NCT), University Clinic Heidelberg, Heidelberg, Germany; <sup>13</sup>Department of Haematology, University of Newcastle, Newcastle Upon Tyne, UK and <sup>14</sup>Department of Haematology, The Royal Marsden Hospital, London, UK

Correspondence: NIELS WEINHOLD - niels.weinhold@med.uni-heidelberg.de

MARTIN F. KAISER - martin.kaiser@icr.ac.uk

doi:10.3324/haematol.2021.278888

SUPPLEMENTAL TABLES

**Supplemental Table 1. Multivariate Cox-regression analysis including gain(1q) and individual R-ISS risk variables.**

| Variable     | Study       | PFS  |      |                  |                |                  | OS   |      |                  |                |                  |
|--------------|-------------|------|------|------------------|----------------|------------------|------|------|------------------|----------------|------------------|
|              |             | Coef | SE   | P                | I <sup>2</sup> | P <sub>het</sub> | Coef | SE   | P                | I <sup>2</sup> | P <sub>het</sub> |
| gain(1q)     | HD4         | 0.34 | 0.15 | 0.02             |                |                  | 0.50 | 0.18 | 0.006            |                |                  |
|              | MM5         | 0.56 | 0.12 | <0.001           |                |                  | 0.83 | 0.17 | <0.001           |                |                  |
|              | MyXI        | 0.18 | 0.08 | 0.04             |                |                  | 0.29 | 0.11 | 0.008            |                |                  |
|              | <b>Meta</b> | 0.35 | 0.12 | <b>0.005</b>     | 72             | 0.03             | 0.52 | 0.17 | <b>0.002</b>     | 72             | 0.03             |
| ISS II       | HD4         | 0.30 | 0.16 | 0.06             |                |                  | 0.56 | 0.21 | 0.008            |                |                  |
|              | MM5         | 0.42 | 0.14 | 0.002            |                |                  | 0.70 | 0.22 | 0.002            |                |                  |
|              | MyXI        | 0.17 | 0.10 | 0.10             |                |                  | 0.35 | 0.15 | 0.02             |                |                  |
|              | <b>Meta</b> | 0.27 | 0.08 | <b>&lt;0.001</b> | 11             | 0.32             | 0.48 | 0.11 | <b>&lt;0.001</b> | 0              | 0.40             |
| ISS III      | HD4         | 0.52 | 0.17 | 0.003            |                |                  | 0.79 | 0.23 | <0.001           |                |                  |
|              | MM5         | 0.53 | 0.14 | <0.001           |                |                  | 1.07 | 0.22 | <0.001           |                |                  |
|              | MyXI        | 0.44 | 0.11 | <0.001           |                |                  | 0.81 | 0.15 | <0.001           |                |                  |
|              | <b>Meta</b> | 0.48 | 0.08 | <b>&lt;0.001</b> | 0              | 0.87             | 0.87 | 0.11 | <b>&lt;0.001</b> | 0              | 0.56             |
| t(4;14)      | HD4         | 0.48 | 0.19 | 0.01             |                |                  | 0.40 | 0.22 | 0.07             |                |                  |
|              | MM5         | 0.23 | 0.18 | 0.21             |                |                  | 0.34 | 0.22 | 0.13             |                |                  |
|              | MyXI        | 0.54 | 0.13 | <0.001           |                |                  | 0.41 | 0.16 | 0.01             |                |                  |
|              | <b>Meta</b> | 0.44 | 0.09 | <b>&lt;0.001</b> | 4              | 0.35             | 0.39 | 0.11 | <b>&lt;0.001</b> | 0              | 0.97             |
| t(14;16)     | HD4         | 0.04 | 0.43 | 0.93             |                |                  | 0.02 | 0.52 | 0.97             |                |                  |
|              | MM5         | 0.70 | 0.29 | 0.02             |                |                  | 0.82 | 0.36 | 0.02             |                |                  |
|              | MyXI        | 0.33 | 0.23 | 0.16             |                |                  | 0.46 | 0.26 | 0.08             |                |                  |
|              | <b>Meta</b> | 0.40 | 0.17 | <b>0.02</b>      | 0              | 0.40             | 0.50 | 0.20 | <b>0.01</b>      | 0              | 0.40             |
| del(17p)     | HD4         | 0.70 | 0.22 | 0.001            |                |                  | 0.94 | 0.24 | <0.001           |                |                  |
|              | MM5         | 0.39 | 0.17 | 0.02             |                |                  | 0.65 | 0.21 | 0.002            |                |                  |
|              | MyXI        | 0.55 | 0.12 | <0.001           |                |                  | 0.86 | 0.15 | <0.001           |                |                  |
|              | <b>Meta</b> | 0.53 | 0.09 | <b>&lt;0.001</b> | 0              | 0.50             | 0.82 | 0.11 | <b>&lt;0.001</b> | 0              | 0.61             |
| LDH > normal | HD4         | 0.20 | 0.17 | 0.24             |                |                  | 0.36 | 0.20 | 0.07             |                |                  |
|              | MM5         | 0.29 | 0.13 | 0.03             |                |                  | 0.09 | 0.19 | 0.63             |                |                  |
|              | MyXI        | 0.10 | 0.09 | 0.26             |                |                  | 0.30 | 0.11 | 0.006            |                |                  |
|              | <b>Meta</b> | 0.16 | 0.07 | <b>0.01</b>      | 0              | 0.47             | 0.27 | 0.09 | <b>0.002</b>     | 0              | 0.56             |

SUPPLEMENTAL FIGURES

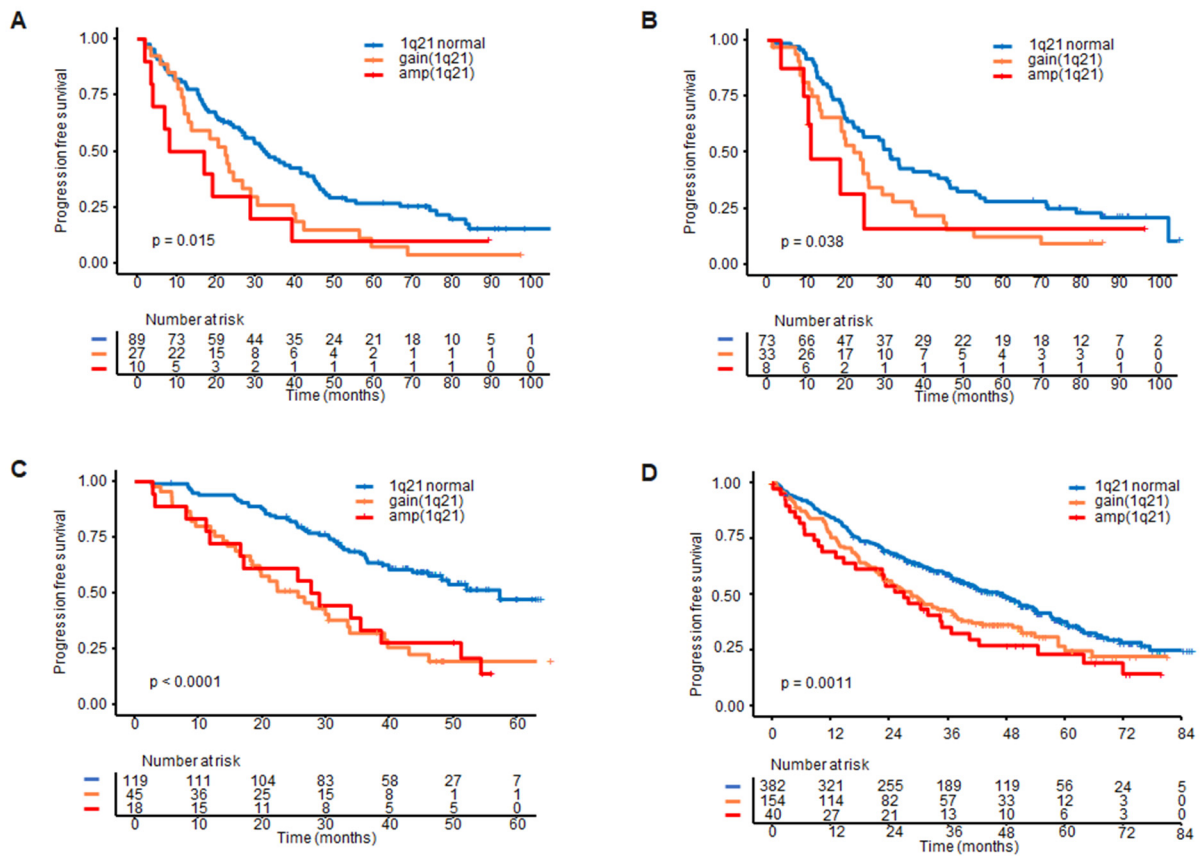

**Supplemental Fig. 1. Prognostic impact of gain and amplification of 1q21 in multiple myeloma.** Kaplan-Meier plots for PFS landmarked from start of maintenance therapy for **A)** the thalidomide treatment arm of HD4, **B)** the bortezomib treatment arm of HD4, **C)** MM5 arms A1 and A2, which received lenalidomide for 2 years, and **D)** the lenalidomide maintenance arm of NCRI Myeloma XI, from maintenance randomization.

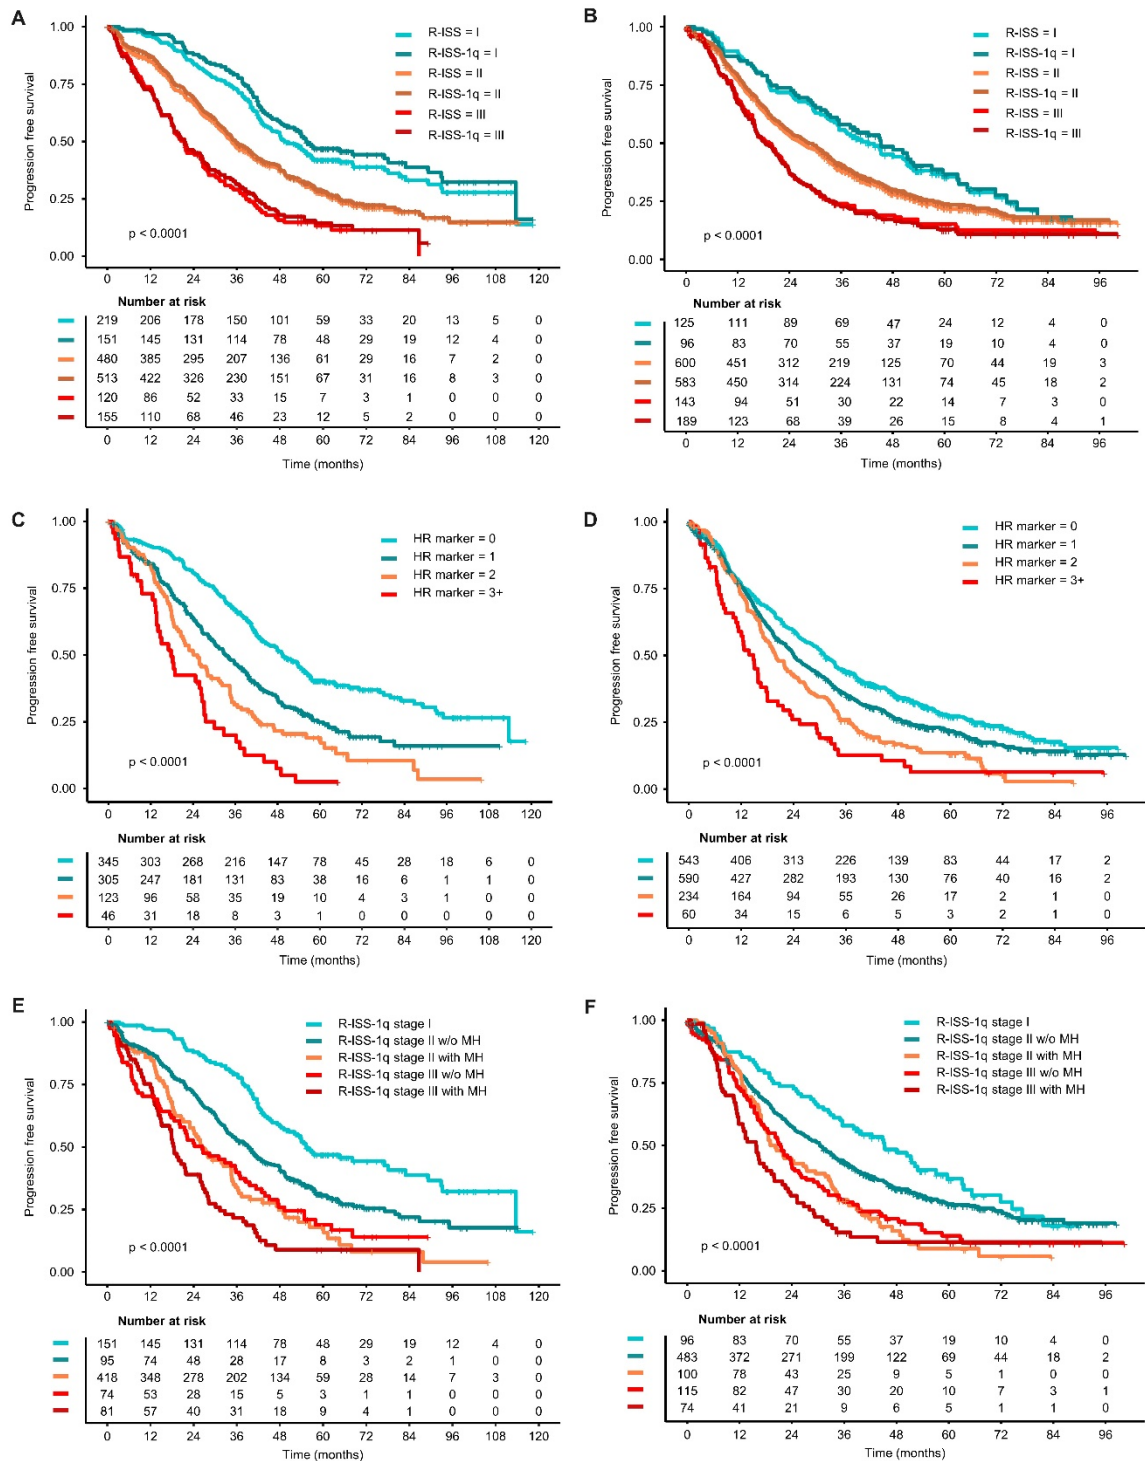

**Supplemental Fig. 2. Prognostic impact of gain(1q) and the number of high risk markers in context of the R-ISS. A-B:** Kaplan-Meier overlay plots demonstrate the impact of including gain(1q) as a risk marker in R-ISS, termed R-ISS-1q. Plots show PFS for R-ISS and for R-ISS-1q for **A)** GMMG and **B)** Myeloma XI. **C-D:** Kaplan-Meier plots are shown for PFS for GMMG (**C)** and Myeloma XI (**D)** patients according to the number of risk markers present in these patients, including gain(1q) and R-ISS markers del(17p), t(4;14), t(14;16) or LDH above upper limit of normal, respectively. **E-F:** Kaplan-Meier plots for PFS showing discrimination of high- and ultra-high-risk groups by including information on co-occurrence of risk markers, called multi-hit, for further sub-grouping of R-ISS-1q stage II and stage III tumors in **E)** GMMG and **F)** Myeloma XI.
